# Supplementary material
Source: publisher figshare collection journal article supplement (https://future-science-group.figshare.com/ndownloader/files/31424419)
Supplement: Supplementary file 1 [file 31424419]

| **Supplementary Table 1**. Frequency distribution of selected characteristics in the cases and controls. | | | | |
| --- | --- | --- | --- | --- |
| HSCR subphenotype | Cases (n=1470) | | Controls (n=1473) | |
| No. | % | No. | % |
| Subjects |  |  |  |  |
| Age range (months) | 8.37±20.50 |  | 18.61±19.75 |  |
| ≤2 | 725 | 49.32% | 458 | 31.09% |
| >2 | 745 | 50.68% | 1015 | 68.91% |
| Sex |  |  |  |  |
| Females | 240 | 16.33% | 458 | 65.65% |
| Males | 1230 | 83.67% | 1015 | 34.35% |
| Clinical manifestation |  |  |  |  |
| SHSCR | 1033 | 70.27% | / | / |
| LHSCR | 294 | 20.00% | / | / |
| TCA | 82 | 5.58% | / | / |
| Total intestine | 3 | 0.20% | / | / |
| Enteritis_before_operation | 261 | 17.76% | / | / |
| Enteritis_after_operation | 249 | 16.94% | / | / |

HSCR, Hirschsprung disease; SHSCR, short-segment Hirschsprung disease; LHSCR, long-segment Hirschsprung disease, TCA, total colonic aganglionosis

| **Supplementary Table 2**. The subclinical information in NB patients collected for the subjects | | | | | | | | | | |
| --- | --- | --- | --- | --- | --- | --- | --- | --- | --- | --- |
| Variables | Combined subjects | | | | | Shaanxi province | | | | |
| Cases (n=469) | | Controls (n=998) | | *P* a | Cases (n=76) | | Controls (n=186) | | *P* a |
| No. | % | No. | % |  | No. | % | No. | % |  |
| Age range, month | 0.00-132.00 | | 0.03-156.00 | | 0.263 | 0.07-89.00 | | 0.03-60.00 | | 0.110 |
| Mean ± SD | 34.07±27.60 | | 32.89±27.43 | |  | 24.48±25.23 | | 23.66±16.66 | |  |
| ≤18 | 169 | 36.03 | 390 | 39.08 |  | 43 | 56.58 | 85 | 45.70 |  |
| >18 | 300 | 63.97 | 608 | 60.92 |  | 33 | 43.42 | 101 | 54.30 |  |
| Gender |  |  |  |  | 0.911 |  |  |  |  | 0.778 |
| Female | 196 | 41.79 | 414 | 41.48 |  | 28 | 36.84 | 72 | 38.71 |  |
| Male | 273 | 58.21 | 584 | 58.52 |  | 48 | 63.16 | 114 | 61.29 |  |
| INSS stages |  |  |  |  |  |  |  |  |  |  |
| I | 133 | 28.42 | / | / |  | 64 | 84.21 | / | / |  |
| II | 100 | 21.37 | / | / |  | 7 | 9.21 | / | / |  |
| III | 69 | 14.74 | / | / |  | 1 | 1.32 | / | / |  |
| IV | 147 | 31.41 | / | / |  | 4 | 5.26 | / | / |  |
| 4s | 11 | 2.35 | / | / |  | / | / | / | / |  |
| NA | 8 | 1.71 | / | / |  | / | / | / | / |  |
| Sites of origin |  |  |  |  |  |  |  |  |  |  |
| Adrenal gland | 162 | 34.54 | / | / |  | 9 | 11.84 | / | / |  |
| Retroperitoneal region | 138 | 29.42 | / | / |  | 51 | 67.11 | / | / |  |
| Mediastinum | 121 | 25.80 | / | / |  | 12 | 15.79 | / | / |  |
| Other region | 40 | 8.53 | / | / |  | 4 | 5.26 | / | / |  |
| NA | 8 | 1.71 | / | / |  | / | / | / | / |  |
| SD, standard deviation; NA, not available.  a Two-sided *2*test for distributions between neuroblastoma cases and cancer-free controls. | | | | | | | | | | |
